# Supplementary material
Source: MDPI journal article supplement (https://www.mdpi.com/2071-1050/15/8/6544)

**Table S1.** Summary of the variables included in each block of indicators latent variables (inner model) and manifest variables (outer model) of the conceptual path model for the study area.

| Latent variable | Class<br>(Integrated<br>indices) | Manifest variable                                   | Type of<br>Model | Data source                                                                                                                                                                                                                                                                                                                                                                                                                                                                                                                                                                                                                                                                                                                                                                                                                                                                |
|-----------------|----------------------------------|-----------------------------------------------------|------------------|----------------------------------------------------------------------------------------------------------------------------------------------------------------------------------------------------------------------------------------------------------------------------------------------------------------------------------------------------------------------------------------------------------------------------------------------------------------------------------------------------------------------------------------------------------------------------------------------------------------------------------------------------------------------------------------------------------------------------------------------------------------------------------------------------------------------------------------------------------------------------|
| Pressures       | Demographic                      | Population<br>(inhabitants/yr)                      | Formative        | <a href="https://www.juntadeandalucia.es/institutodeestadisticaycartografia/anuario/anuario99/index.htm">https://www.juntadeandalucia.es/institutodeestadisticaycartografia/anuario/anuario99/index.htm</a><br><a href="https://www.ine.es/ss/Satellite?L=es_ES&amp;c=Page&amp;cid=1254735038429&amp;p=1254735038429&amp;pagename=IOEhist%2FIOEhistLayout&amp;param1=1&amp;param2=67000000">https://www.ine.es/ss/Satellite?L=es_ES&amp;c=Page&amp;cid=1254735038429&amp;p=1254735038429&amp;pagename=IOEhist%2FIOEhistLayout&amp;param1=1&amp;param2=67000000</a>                                                                                                                                                                                                                                                                                                         |
| Pressures       | Economic                         | Per capita fish<br>consumption<br>(kg/inhabitants)* | Formative        | <a href="https://www.mapa.gob.es/app/consumo-en-hogares/resultado1.asp">https://www.mapa.gob.es/app/consumo-en-hogares/resultado1.asp</a><br><a href="https://www.mapa.gob.es/es/estadistica/temas/publicaciones/anuario-de-estadistica">https://www.mapa.gob.es/es/estadistica/temas/publicaciones/anuario-de-estadistica</a><br><a href="https://www.mapa.gob.es/es/alimentacion/temas/consumo-tendencias/panel-de-consumo-alimentario/series-anuales/">https://www.mapa.gob.es/es/alimentacion/temas/consumo-tendencias/panel-de-consumo-alimentario/series-anuales/</a>                                                                                                                                                                                                                                                                                                |
| Pressures       | Economic                         | Fish per capita spending<br>(€/inhabitants)*        | Formative        | <a href="https://www.mapa.gob.es/app/consumo-en-hogares/resultado1.asp">https://www.mapa.gob.es/app/consumo-en-hogares/resultado1.asp</a><br><a href="https://www.mapa.gob.es/es/estadistica/temas/publicaciones/anuario-de-estadistica">https://www.mapa.gob.es/es/estadistica/temas/publicaciones/anuario-de-estadistica</a><br><a href="https://www.mapa.gob.es/es/alimentacion/temas/consumo-tendencias/panel-de-consumo-alimentario/series-anuales/">https://www.mapa.gob.es/es/alimentacion/temas/consumo-tendencias/panel-de-consumo-alimentario/series-anuales/</a>                                                                                                                                                                                                                                                                                                |
| Pressures       | Cultural                         | n° advertisements<br>promoting fish<br>consumption* | Formative        | <a href="http://www.alimentacion.es/es/campanas/pescados/">http://www.alimentacion.es/es/campanas/pescados/</a><br><a href="https://www.juntadeandalucia.es/export/drupaljda/HISTORICO_WEB.pdf">https://www.juntadeandalucia.es/export/drupaljda/HISTORICO_WEB.pdf</a><br><a href="https://www.juntadeandalucia.es/organismos/agriculturaganaderiapescaydesarrollosostenible/areas/pescaacuicultura/comercializacion/paginas/informe-promocion.html">https://www.juntadeandalucia.es/organismos/agriculturaganaderiapescaydesarrollosostenible/areas/pescaacuicultura/comercializacion/paginas/informe-promocion.html</a><br><a href="https://www.alimentosdespana.es/es/campanas/ultimas-campanas/pescados-moluscos-crustaceos/pescados/default.aspx">https://www.alimentosdespana.es/es/campanas/ultimas-campanas/pescados-moluscos-crustaceos/pescados/default.aspx</a> |







| Latent variable              | Class<br>(Integrated<br>indices)    | Manifest variable                               | Type of<br>Model | Data source                                                                                                                                                                                                                                                                                                                                                                                                                                                                                                                                                                                                                                                                                                                                                                                                                                                                                                                                                       |
|------------------------------|-------------------------------------|-------------------------------------------------|------------------|-------------------------------------------------------------------------------------------------------------------------------------------------------------------------------------------------------------------------------------------------------------------------------------------------------------------------------------------------------------------------------------------------------------------------------------------------------------------------------------------------------------------------------------------------------------------------------------------------------------------------------------------------------------------------------------------------------------------------------------------------------------------------------------------------------------------------------------------------------------------------------------------------------------------------------------------------------------------|
| Cultural ecosystem service   | Artisanal fishery                   | n° artisanal vessels                            | Reflective       | <a href="http://www.juntadeandalucia.es/organismos/agriculturapesca/develop/indicadores/indicadores-de-sostenibilidad-de-ecosistemas-culturales-y-servicios-ecosistemicos-de-pesca-y-aquicultura-artesanal">http://www.juntadeandalucia.es/organismos/agriculturapesca/develop/indicadores/indicadores-de-sostenibilidad-de-ecosistemas-culturales-y-servicios-ecosistemicos-de-pesca-y-aquicultura-artesanal</a><br><a href="https://www.mapama.gob.es/es/pesca/temas/indicadores-de-sostenibilidad-de-ecosistemas-culturales-y-servicios-ecosistemicos-de-pesca-y-aquicultura-artesanal">https://www.mapama.gob.es/es/pesca/temas/indicadores-de-sostenibilidad-de-ecosistemas-culturales-y-servicios-ecosistemicos-de-pesca-y-aquicultura-artesanal</a><br><a href="https://www.ige.eu/web/mostrador_actividades_estadisticas.jsp?idioma=gl&amp;codigo=0301004">https://www.ige.eu/web/mostrador_actividades_estadisticas.jsp?idioma=gl&amp;codigo=0301004</a> |
| Cultural ecosystem service   | Artisanal fishery                   | Gross tonnage of artisanal vessels              | Reflective       | <a href="http://www.juntadeandalucia.es/organismos/agriculturapesca/develop/indicadores/indicadores-de-sostenibilidad-de-ecosistemas-culturales-y-servicios-ecosistemicos-de-pesca-y-aquicultura-artesanal">http://www.juntadeandalucia.es/organismos/agriculturapesca/develop/indicadores/indicadores-de-sostenibilidad-de-ecosistemas-culturales-y-servicios-ecosistemicos-de-pesca-y-aquicultura-artesanal</a><br><a href="https://www.mapama.gob.es/es/pesca/temas/indicadores-de-sostenibilidad-de-ecosistemas-culturales-y-servicios-ecosistemicos-de-pesca-y-aquicultura-artesanal">https://www.mapama.gob.es/es/pesca/temas/indicadores-de-sostenibilidad-de-ecosistemas-culturales-y-servicios-ecosistemicos-de-pesca-y-aquicultura-artesanal</a><br><a href="https://www.ige.eu/web/mostrador_actividades_estadisticas.jsp?idioma=gl&amp;codigo=0301004">https://www.ige.eu/web/mostrador_actividades_estadisticas.jsp?idioma=gl&amp;codigo=0301004</a> |
| Cultural ecosystem service   | Artisanal fishery                   | Total power of artisanal fisheries vessels (kW) | Reflective       | <a href="http://www.juntadeandalucia.es/organismos/agriculturapesca/develop/indicadores/indicadores-de-sostenibilidad-de-ecosistemas-culturales-y-servicios-ecosistemicos-de-pesca-y-aquicultura-artesanal">http://www.juntadeandalucia.es/organismos/agriculturapesca/develop/indicadores/indicadores-de-sostenibilidad-de-ecosistemas-culturales-y-servicios-ecosistemicos-de-pesca-y-aquicultura-artesanal</a><br><a href="https://www.mapama.gob.es/es/pesca/temas/indicadores-de-sostenibilidad-de-ecosistemas-culturales-y-servicios-ecosistemicos-de-pesca-y-aquicultura-artesanal">https://www.mapama.gob.es/es/pesca/temas/indicadores-de-sostenibilidad-de-ecosistemas-culturales-y-servicios-ecosistemicos-de-pesca-y-aquicultura-artesanal</a><br><a href="https://www.ige.eu/web/mostrador_actividades_estadisticas.jsp?idioma=gl&amp;codigo=0301004">https://www.ige.eu/web/mostrador_actividades_estadisticas.jsp?idioma=gl&amp;codigo=0301004</a> |
| Regulating ecosystem service | Marine Trophic Index (MTI)          | MTI*(deleted only in the Gulf of Cádiz)         | Reflective       | <a href="#">INDEX, M. T. (2004). Convention on biological diversity. Science, 279, 860-863.</a><br><a href="#">Mace, G., Delbaere, B., &amp; Hanski, I. (2005). A user's guide to biodiversity indicators. European Academy of Sciences Advisory Council (<a href="http://www.easac.org/EASACBioindicator.pdf">http://www.easac.org/EASACBioindicator.pdf</a>).</a>                                                                                                                                                                                                                                                                                                                                                                                                                                                                                                                                                                                               |
| Regulating ecosystem service | Primary productivity required (PPR) | PPR                                             | Reflective       | <a href="#">Watson, R., Zeller, D., &amp; Pauly, D. (2014). Primary productivity demands of global fishing fleets. Fish and Fisheries, 15(2), 231-241.</a>                                                                                                                                                                                                                                                                                                                                                                                                                                                                                                                                                                                                                                                                                                                                                                                                        |
|                              |                                     |                                                 |                  |                                                                                                                                                                                                                                                                                                                                                                                                                                                                                                                                                                                                                                                                                                                                                                                                                                                                                                                                                                   |
| Management policies          | National Management policies        | Number of protection categories for captured    | Formative        | <a href="https://www.miteco.gob.es/es/biodiversidad/temas/conservacion-de-especies/tabla_lespe_cea_19_tcm30-201186.xlsx">https://www.miteco.gob.es/es/biodiversidad/temas/conservacion-de-especies/tabla_lespe_cea_19_tcm30-201186.xlsx</a>                                                                                                                                                                                                                                                                                                                                                                                                                                                                                                                                                                                                                                                                                                                       |

| Latent variable     | Class<br>(Integrated<br>indices) | Manifest variable                                                                    | Type of<br>Model | Data source                                                                                                                                                                                                                                                                                                                                                                                                               |
|---------------------|----------------------------------|--------------------------------------------------------------------------------------|------------------|---------------------------------------------------------------------------------------------------------------------------------------------------------------------------------------------------------------------------------------------------------------------------------------------------------------------------------------------------------------------------------------------------------------------------|
|                     |                                  | species included in the Spanish Catalogue                                            |                  |                                                                                                                                                                                                                                                                                                                                                                                                                           |
| Management policies | National Management policies     | Number of protection categories for seabirds included in the Spanish Catalogue       | Formative        | <a href="https://www.miteco.gob.es/es/biodiversidad/temas/conservacion-de-especies/tabla_lespe_cea_19_tcm30-201186.xlsx">https://www.miteco.gob.es/es/biodiversidad/temas/conservacion-de-especies/tabla_lespe_cea_19_tcm30-201186.xlsx</a>                                                                                                                                                                               |
| Management policies | National Management policies     | Number of protection categories for cetaceans included in the Spanish Catalogue      | Formative        | <a href="https://www.miteco.gob.es/es/biodiversidad/temas/conservacion-de-especies/tabla_lespe_cea_19_tcm30-201186.xlsx">https://www.miteco.gob.es/es/biodiversidad/temas/conservacion-de-especies/tabla_lespe_cea_19_tcm30-201186.xlsx</a>                                                                                                                                                                               |
| Management policies | National Management policies     | Number of protection categories for sea turtles included in the Spanish Catalogue    | Formative        | <a href="https://www.miteco.gob.es/es/biodiversidad/temas/conservacion-de-especies/tabla_lespe_cea_19_tcm30-201186.xlsx">https://www.miteco.gob.es/es/biodiversidad/temas/conservacion-de-especies/tabla_lespe_cea_19_tcm30-201186.xlsx</a>                                                                                                                                                                               |
| Management policies | Regional Management policies     | Number of protection categories for seabirds included in the Andalusian Catalogue    | Formative        | <a href="https://www.juntadeandalucia.es/medioambiente/portal_web/web/servicios/centro_de_documentacion_y_biblioteca/fondo_editorial_digital/documentos_tecnicos/Libro_rojo_vertebrados/documento_completo.pdf">https://www.juntadeandalucia.es/medioambiente/portal_web/web/servicios/centro_de_documentacion_y_biblioteca/fondo_editorial_digital/documentos_tecnicos/Libro_rojo_vertebrados/documento_completo.pdf</a> |
| Management policies | Regional Management policies     | Number of protection categories for cetaceans included in the Andalusian Catalogue   | Formative        | <a href="https://www.juntadeandalucia.es/medioambiente/portal_web/web/servicios/centro_de_documentacion_y_biblioteca/fondo_editorial_digital/documentos_tecnicos/Libro_rojo_vertebrados/documento_completo.pdf">https://www.juntadeandalucia.es/medioambiente/portal_web/web/servicios/centro_de_documentacion_y_biblioteca/fondo_editorial_digital/documentos_tecnicos/Libro_rojo_vertebrados/documento_completo.pdf</a> |
| Management policies | Regional Management policies     | Number of protection categories for sea turtles included in the Andalusian Catalogue | Formative        | <a href="https://www.juntadeandalucia.es/medioambiente/portal_web/web/servicios/centro_de_documentacion_y_biblioteca/fondo_editorial_digital/documentos_tecnicos/Libro_rojo_vertebrados/documento_completo.pdf">https://www.juntadeandalucia.es/medioambiente/portal_web/web/servicios/centro_de_documentacion_y_biblioteca/fondo_editorial_digital/documentos_tecnicos/Libro_rojo_vertebrados/documento_completo.pdf</a> |

| Latent variable       | Class<br>(Integrated<br>indices)          | Manifest variable                                                            | Type of<br>Model | Data source                                                                                                                                                                                                                                                                                                                                                                                                                                                                                                                                                                                                                                                                                                                                   |
|-----------------------|-------------------------------------------|------------------------------------------------------------------------------|------------------|-----------------------------------------------------------------------------------------------------------------------------------------------------------------------------------------------------------------------------------------------------------------------------------------------------------------------------------------------------------------------------------------------------------------------------------------------------------------------------------------------------------------------------------------------------------------------------------------------------------------------------------------------------------------------------------------------------------------------------------------------|
| Management policies   | European Management policies              | Number of seabird species included in Birds Directive                        | Formative        | <a href="http://www.birdlife.org/">http://www.birdlife.org/</a><br><a href="http://ec.europa.eu/environment/nature/legislation/birdsdirective/index_en.htm">http://ec.europa.eu/environment/nature/legislation/birdsdirective/index_en.htm</a>                                                                                                                                                                                                                                                                                                                                                                                                                                                                                                |
| Management policies   | European Management policies              | Number of species included in European and International Fishing Regulations | Formative        | <a href="https://eur-lex.europa.eu/">https://eur-lex.europa.eu/</a><br><a href="https://www.mapa.gob.es/es/pesca/temas/planes-de-gestion-y-recuperacion-de-especies/plan-de-recuperacion-plurianual-para-el-atun-rojo-del-atlantico-este-y-mediterraneo/">https://www.mapa.gob.es/es/pesca/temas/planes-de-gestion-y-recuperacion-de-especies/plan-de-recuperacion-plurianual-para-el-atun-rojo-del-atlantico-este-y-mediterraneo/</a><br><a href="https://www.mapa.gob.es/es/pesca/temas/planes-de-gestion-y-recuperacion-de-especies/medidas-de-gestion-del-pezu-espada-en-el-mediterraneo/">https://www.mapa.gob.es/es/pesca/temas/planes-de-gestion-y-recuperacion-de-especies/medidas-de-gestion-del-pezu-espada-en-el-mediterraneo/</a> |
| Management policies   | National Management policies              | Number of species included in National Fishing Regulations                   | Formative        | <a href="https://www.mapa.gob.es/es/pesca/temas/planes-de-gestion-y-recuperacion-de-especies/">https://www.mapa.gob.es/es/pesca/temas/planes-de-gestion-y-recuperacion-de-especies/</a>                                                                                                                                                                                                                                                                                                                                                                                                                                                                                                                                                       |
| Management policies   | Regional Management policies              | Number of species included in Regional Fishing Regulations                   | Formative        | <a href="https://www.juntadeandalucia.es/eboja">https://www.juntadeandalucia.es/eboja</a><br><a href="https://www.boe.es">https://www.boe.es</a>                                                                                                                                                                                                                                                                                                                                                                                                                                                                                                                                                                                              |
| Management policies   | European Management policies              | Number of European and International Fishing Regulations                     | Formative        | <a href="https://eur-lex.europa.eu/">https://eur-lex.europa.eu/</a>                                                                                                                                                                                                                                                                                                                                                                                                                                                                                                                                                                                                                                                                           |
| Management policies   | National Management policies              | Number of National Fishing Regulations                                       | Formative        | <a href="https://www.mapama.gob.es/es/pesca/legislacion/Caladernacional.aspx">https://www.mapama.gob.es/es/pesca/legislacion/Caladernacional.aspx</a>                                                                                                                                                                                                                                                                                                                                                                                                                                                                                                                                                                                         |
| Management policies   | Regional Management policies              | Number of Regional Fishing Regulations                                       | Formative        | <a href="https://normativapesquera.wordpress.com/lex-espanola/caladeros/mediterraneo/">https://normativapesquera.wordpress.com/lex-espanola/caladeros/mediterraneo/</a>                                                                                                                                                                                                                                                                                                                                                                                                                                                                                                                                                                       |
| Conservation Policies | Number of regulations for protected areas | Number of regulations for protected areas                                    | Formative        | <a href="https://www.miteco.gob.es/es/costas/temas/proteccion-medio-marino/biodiversidad-marina/espacios-marinos-">https://www.miteco.gob.es/es/costas/temas/proteccion-medio-marino/biodiversidad-marina/espacios-marinos-</a>                                                                                                                                                                                                                                                                                                                                                                                                                                                                                                               |

| Latent variable       | Class<br>(Integrated<br>indices)                        | Manifest variable                                       | Type of<br>Model | Data source                                                                                                                                                                                                                                                                                                                                                                                                                                                                                                                                                                                                                                                                                                                                         |
|-----------------------|---------------------------------------------------------|---------------------------------------------------------|------------------|-----------------------------------------------------------------------------------------------------------------------------------------------------------------------------------------------------------------------------------------------------------------------------------------------------------------------------------------------------------------------------------------------------------------------------------------------------------------------------------------------------------------------------------------------------------------------------------------------------------------------------------------------------------------------------------------------------------------------------------------------------|
|                       |                                                         |                                                         |                  | <a href="http://protegidos/red-areas-marin-as-protegidas-espana/bm_emprot_rampe_espacios.aspx">protegidos/red-areas-marin-as-protegidas-espana/bm_emprot_rampe_espacios.aspx</a><br><a href="https://www.miteco.gob.es/es/biodiversidad/servicios/banco-datos-naturaleza/informacion-disponible/zepim.aspx">https://www.miteco.gob.es/es/biodiversidad/servicios/banco-datos-naturaleza/informacion-disponible/zepim.aspx</a>                                                                                                                                                                                                                                                                                                                       |
| Conservation Policies | Total Number of Marine Protected areas and reserves     | Total Number of Marine Protected areas and reserves     | Formative        | <a href="http://www.reservasmarinas.net">http://www.reservasmarinas.net</a><br><a href="https://www.miteco.gob.es/es/costas/temas/proteccion-medio-marino/biodiversidad-marina/espacios-marinos-protegidos/red-areas-marin-as-protegidas-espana/bm_emprot_rampe_espacios.aspx">https://www.miteco.gob.es/es/costas/temas/proteccion-medio-marino/biodiversidad-marina/espacios-marinos-protegidos/red-areas-marin-as-protegidas-espana/bm_emprot_rampe_espacios.aspx</a><br><a href="https://www.miteco.gob.es/es/biodiversidad/servicios/banco-datos-naturaleza/informacion-disponible/Espacios_marinos_AGE.aspx">https://www.miteco.gob.es/es/biodiversidad/servicios/banco-datos-naturaleza/informacion-disponible/Espacios_marinos_AGE.aspx</a> |
| Conservation Policies | Changes in the Total Marine Protected Area Surface (ha) | Changes in the Total Marine Protected Area Surface (ha) | Formative        | <a href="http://www.reservasmarinas.net">http://www.reservasmarinas.net</a><br><a href="https://www.miteco.gob.es/es/costas/temas/proteccion-medio-marino/biodiversidad-marina/espacios-marinos-protegidos/red-areas-marin-as-protegidas-espana/bm_emprot_rampe_espacios.aspx">https://www.miteco.gob.es/es/costas/temas/proteccion-medio-marino/biodiversidad-marina/espacios-marinos-protegidos/red-areas-marin-as-protegidas-espana/bm_emprot_rampe_espacios.aspx</a><br><a href="https://www.miteco.gob.es/es/biodiversidad/servicios/banco-datos-naturaleza/informacion-disponible/Espacios_marinos_AGE.aspx">https://www.miteco.gob.es/es/biodiversidad/servicios/banco-datos-naturaleza/informacion-disponible/Espacios_marinos_AGE.aspx</a> |
| Conservation Policies | Changes in the Total Marine Protected Area Surface (ha) | Surface Biosphere Reserve (ha)                          | Formative        | <a href="http://www.reservasmarinas.net">http://www.reservasmarinas.net</a><br><a href="https://www.miteco.gob.es/es/costas/temas/proteccion-medio-marino/biodiversidad-marina/espacios-marinos-protegidos/red-areas-marin-as-protegidas-espana/bm_emprot_rampe_espacios.aspx">https://www.miteco.gob.es/es/costas/temas/proteccion-medio-marino/biodiversidad-marina/espacios-marinos-protegidos/red-areas-marin-as-protegidas-espana/bm_emprot_rampe_espacios.aspx</a><br><a href="https://www.miteco.gob.es/es/biodiversidad/temas/espacios-protegidos/red-natura-2000/default.aspx">https://www.miteco.gob.es/es/biodiversidad/temas/espacios-protegidos/red-natura-2000/default.aspx</a>                                                       |



| Latent variable       | Class<br>(Integrated<br>indices)                        | Manifest variable                                 | Type of<br>Model | Data source                                                                                                                                                                                                                                                                                                                                                                                                                                                                                                                                                                                                                                                                                                                                       |
|-----------------------|---------------------------------------------------------|---------------------------------------------------|------------------|---------------------------------------------------------------------------------------------------------------------------------------------------------------------------------------------------------------------------------------------------------------------------------------------------------------------------------------------------------------------------------------------------------------------------------------------------------------------------------------------------------------------------------------------------------------------------------------------------------------------------------------------------------------------------------------------------------------------------------------------------|
| Conservation Policies | Changes in the Total Marine Protected Area Surface (ha) | Reserva Intercontinental Andalucía-Marruecos (ha) | Formative        | <a href="http://www.reservasmarinas.net">http://www.reservasmarinas.net</a><br><a href="https://www.miteco.gob.es/es/costas/temas/proteccion-medio-marino/biodiversidad-marina/espacios-marinos-protegidos/red-areas-marinas-protegidas-espana/bm_emprot_rampe_espacios.aspx">https://www.miteco.gob.es/es/costas/temas/proteccion-medio-marino/biodiversidad-marina/espacios-marinos-protegidos/red-areas-marinas-protegidas-espana/bm_emprot_rampe_espacios.aspx</a>                                                                                                                                                                                                                                                                            |
| Conservation Policies | Changes in the Total Marine Protected Area Surface (ha) | <sup>a</sup> SCIs (ha)                            | Formative        | <a href="http://www.reservasmarinas.net">http://www.reservasmarinas.net</a><br><a href="https://www.miteco.gob.es/es/costas/temas/proteccion-medio-marino/biodiversidad-marina/espacios-marinos-protegidos/red-areas-marinas-protegidas-espana/bm_emprot_rampe_espacios.aspx">https://www.miteco.gob.es/es/costas/temas/proteccion-medio-marino/biodiversidad-marina/espacios-marinos-protegidos/red-areas-marinas-protegidas-espana/bm_emprot_rampe_espacios.aspx</a><br><a href="https://www.miteco.gob.es/es/biodiversidad/servicios/banco-datos-naturaleza/informacion-disponible/Espacios_marinos_AGE.aspx">https://www.miteco.gob.es/es/biodiversidad/servicios/banco-datos-naturaleza/informacion-disponible/Espacios_marinos_AGE.aspx</a> |
| Conservation Policies | Changes in the Total Marine Protected Area Surface (ha) | <sup>c</sup> SAC (ha)                             | Formative        | <a href="http://www.reservasmarinas.net">http://www.reservasmarinas.net</a><br><a href="https://www.miteco.gob.es/es/costas/temas/proteccion-medio-marino/biodiversidad-marina/espacios-marinos-protegidos/red-areas-marinas-protegidas-espana/bm_emprot_rampe_espacios.aspx">https://www.miteco.gob.es/es/costas/temas/proteccion-medio-marino/biodiversidad-marina/espacios-marinos-protegidos/red-areas-marinas-protegidas-espana/bm_emprot_rampe_espacios.aspx</a><br><a href="https://www.miteco.gob.es/es/biodiversidad/servicios/banco-datos-naturaleza/informacion-disponible/Espacios_marinos_AGE.aspx">https://www.miteco.gob.es/es/biodiversidad/servicios/banco-datos-naturaleza/informacion-disponible/Espacios_marinos_AGE.aspx</a> |
| Conservation Policies | Changes in the Total Marine Protected Area Surface (ha) | Marine Reserve (ha)                               | Formative        | <a href="http://www.reservasmarinas.net">http://www.reservasmarinas.net</a><br><a href="https://www.miteco.gob.es/es/costas/temas/proteccion-medio-marino/biodiversidad-marina/espacios-marinos-protegidos/red-areas-marinas-protegidas-espana/bm_emprot_rampe_espacios.aspx">https://www.miteco.gob.es/es/costas/temas/proteccion-medio-marino/biodiversidad-marina/espacios-marinos-protegidos/red-areas-marinas-protegidas-espana/bm_emprot_rampe_espacios.aspx</a><br><a href="https://www.miteco.gob.es/es/biodiversidad/servicios/banco-datos-naturaleza/informacion-disponible/Espacios_marinos_AGE.aspx">https://www.miteco.gob.es/es/biodiversidad/servicios/banco-datos-naturaleza/informacion-disponible/Espacios_marinos_AGE.aspx</a> |

| Latent variable       | Class<br>(Integrated<br>indices)                        | Manifest variable                                 | Type of<br>Model | Data source                                                                                                                                                                                                                                                                                                                                                                                                                                                                                                                                                                                                                                                                                                                                                                                                                                                                                                                       |
|-----------------------|---------------------------------------------------------|---------------------------------------------------|------------------|-----------------------------------------------------------------------------------------------------------------------------------------------------------------------------------------------------------------------------------------------------------------------------------------------------------------------------------------------------------------------------------------------------------------------------------------------------------------------------------------------------------------------------------------------------------------------------------------------------------------------------------------------------------------------------------------------------------------------------------------------------------------------------------------------------------------------------------------------------------------------------------------------------------------------------------|
| Conservation Policies | Changes in the Total Marine Protected Area Surface (ha) | Paraje Natural (ha)                               | Formative        | <a href="http://www.reservasmarinas.net">http://www.reservasmarinas.net</a><br><a href="https://www.miteco.gob.es/es/costas/temas/proteccion-medio-marino/biodiversidad-marina/espacios-marinos-protegidos/red-areas-marinas-protegidas-espana/bm_emprot_rampe_espacios.aspx">https://www.miteco.gob.es/es/costas/temas/proteccion-medio-marino/biodiversidad-marina/espacios-marinos-protegidos/red-areas-marinas-protegidas-espana/bm_emprot_rampe_espacios.aspx</a><br><a href="http://www.juntadeandalucia.es/medioambiente/site/portalweb/menuitem.7e1cf46ddf59bb227a9ebe205510e1ca/?vgnextoid=2b22ad0b5688f410VgnVCM1000001325e50aRCRD&amp;vgnextchannel=d8d64e5bf01f4310VgnVCM1000001325e50aRCRD">http://www.juntadeandalucia.es/medioambiente/site/portalweb/menuitem.7e1cf46ddf59bb227a9ebe205510e1ca/?vgnextoid=2b22ad0b5688f410VgnVCM1000001325e50aRCRD&amp;vgnextchannel=d8d64e5bf01f4310VgnVCM1000001325e50aRCRD</a> |
| Conservation Policies | Changes in the Total Marine Protected Area Surface (ha) | Parque Natural (ha)                               | Formative        | <a href="http://www.reservasmarinas.net">http://www.reservasmarinas.net</a><br><a href="https://www.miteco.gob.es/es/costas/temas/proteccion-medio-marino/biodiversidad-marina/espacios-marinos-protegidos/red-areas-marinas-protegidas-espana/bm_emprot_rampe_espacios.aspx">https://www.miteco.gob.es/es/costas/temas/proteccion-medio-marino/biodiversidad-marina/espacios-marinos-protegidos/red-areas-marinas-protegidas-espana/bm_emprot_rampe_espacios.aspx</a><br><a href="http://www.juntadeandalucia.es/medioambiente/site/portalweb/menuitem.7e1cf46ddf59bb227a9ebe205510e1ca/?vgnextoid=2b22ad0b5688f410VgnVCM1000001325e50aRCRD&amp;vgnextchannel=d8d64e5bf01f4310VgnVCM1000001325e50aRCRD">http://www.juntadeandalucia.es/medioambiente/site/portalweb/menuitem.7e1cf46ddf59bb227a9ebe205510e1ca/?vgnextoid=2b22ad0b5688f410VgnVCM1000001325e50aRCRD&amp;vgnextchannel=d8d64e5bf01f4310VgnVCM1000001325e50aRCRD</a> |
| Conservation Policies | Total Number of Marine Protected areas and reserves     | Biosphere Reserve (n°)                            | Formative        | <a href="http://www.reservasmarinas.net">http://www.reservasmarinas.net</a><br><a href="https://www.miteco.gob.es/es/costas/temas/proteccion-medio-marino/biodiversidad-marina/espacios-marinos-protegidos/red-areas-marinas-protegidas-espana/bm_emprot_rampe_espacios.aspx">https://www.miteco.gob.es/es/costas/temas/proteccion-medio-marino/biodiversidad-marina/espacios-marinos-protegidos/red-areas-marinas-protegidas-espana/bm_emprot_rampe_espacios.aspx</a><br><a href="https://www.miteco.gob.es/es/biodiversidad/temas/espacios-protegidos/red-natura-2000/default.aspx">https://www.miteco.gob.es/es/biodiversidad/temas/espacios-protegidos/red-natura-2000/default.aspx</a>                                                                                                                                                                                                                                       |
| Conservation Policies | Total Number of Marine Protected areas and reserves     | Reserva Intercontinental Andalucía-Marruecos (n°) | Formative        | <a href="http://www.reservasmarinas.net">http://www.reservasmarinas.net</a><br><a href="https://www.miteco.gob.es/es/costas/temas/proteccion-medio-marino/biodiversidad-marina/espacios-marinos-protegidos/red-natura-2000/default.aspx">https://www.miteco.gob.es/es/costas/temas/proteccion-medio-marino/biodiversidad-marina/espacios-marinos-protegidos/red-natura-2000/default.aspx</a>                                                                                                                                                                                                                                                                                                                                                                                                                                                                                                                                      |

| Latent variable       | Class<br>(Integrated<br>indices)                    | Manifest variable      | Type of<br>Model | Data source                                                                                                                                                                                                                                                                                                                                                                                                                                                                                                                                                                                                                                                                                                                                         |
|-----------------------|-----------------------------------------------------|------------------------|------------------|-----------------------------------------------------------------------------------------------------------------------------------------------------------------------------------------------------------------------------------------------------------------------------------------------------------------------------------------------------------------------------------------------------------------------------------------------------------------------------------------------------------------------------------------------------------------------------------------------------------------------------------------------------------------------------------------------------------------------------------------------------|
|                       |                                                     |                        |                  | <a href="http://protegidos/red-areas-marin-as-protegidas-espana/bm_emprot_rampe_espacios.aspx">protegidos/red-areas-marin-as-protegidas-espana/bm_emprot_rampe_espacios.aspx</a>                                                                                                                                                                                                                                                                                                                                                                                                                                                                                                                                                                    |
| Conservation Policies | Total Number of Marine Protected areas and reserves | <sup>a</sup> SCIs (n°) | Formative        | <a href="http://www.reservasmarinas.net">http://www.reservasmarinas.net</a><br><a href="https://www.miteco.gob.es/es/costas/temas/proteccion-medio-marino/biodiversidad-marina/espacios-marinos-protegidos/red-areas-marin-as-protegidas-espana/bm_emprot_rampe_espacios.aspx">https://www.miteco.gob.es/es/costas/temas/proteccion-medio-marino/biodiversidad-marina/espacios-marinos-protegidos/red-areas-marin-as-protegidas-espana/bm_emprot_rampe_espacios.aspx</a><br><a href="https://www.miteco.gob.es/es/biodiversidad/servicios/banco-datos-naturaleza/informacion-disponible/Espacios_marinos_AGE.aspx">https://www.miteco.gob.es/es/biodiversidad/servicios/banco-datos-naturaleza/informacion-disponible/Espacios_marinos_AGE.aspx</a> |
| Conservation Policies | Total Number of Marine Protected areas and reserves | <sup>b</sup> SPAs (n°) | Formative        | <a href="http://www.reservasmarinas.net">http://www.reservasmarinas.net</a><br><a href="https://www.miteco.gob.es/es/costas/temas/proteccion-medio-marino/biodiversidad-marina/espacios-marinos-protegidos/red-areas-marin-as-protegidas-espana/bm_emprot_rampe_espacios.aspx">https://www.miteco.gob.es/es/costas/temas/proteccion-medio-marino/biodiversidad-marina/espacios-marinos-protegidos/red-areas-marin-as-protegidas-espana/bm_emprot_rampe_espacios.aspx</a><br><a href="https://www.miteco.gob.es/es/biodiversidad/servicios/banco-datos-naturaleza/informacion-disponible/Espacios_marinos_AGE.aspx">https://www.miteco.gob.es/es/biodiversidad/servicios/banco-datos-naturaleza/informacion-disponible/Espacios_marinos_AGE.aspx</a> |
| Conservation Policies | Total Number of Marine Protected areas and reserves | <sup>c</sup> SAC (n°)  | Formative        | <a href="http://www.reservasmarinas.net">http://www.reservasmarinas.net</a><br><a href="https://www.miteco.gob.es/es/costas/temas/proteccion-medio-marino/biodiversidad-marina/espacios-marinos-protegidos/red-areas-marin-as-protegidas-espana/bm_emprot_rampe_espacios.aspx">https://www.miteco.gob.es/es/costas/temas/proteccion-medio-marino/biodiversidad-marina/espacios-marinos-protegidos/red-areas-marin-as-protegidas-espana/bm_emprot_rampe_espacios.aspx</a><br><a href="https://www.miteco.gob.es/es/biodiversidad/servicios/banco-datos-naturaleza/informacion-disponible/Espacios_marinos_AGE.aspx">https://www.miteco.gob.es/es/biodiversidad/servicios/banco-datos-naturaleza/informacion-disponible/Espacios_marinos_AGE.aspx</a> |
| Conservation Policies | Total Number of Marine Protected areas and reserves | Marine Reserve (n°)    | Formative        | <a href="http://www.reservasmarinas.net">http://www.reservasmarinas.net</a><br><a href="https://www.miteco.gob.es/es/costas/temas/proteccion-medio-marino/biodiversidad-marina/espacios-marinos-protegidos/red-areas-marin-as-protegidas-espana/bm_emprot_rampe_espacios.aspx">https://www.miteco.gob.es/es/costas/temas/proteccion-medio-marino/biodiversidad-marina/espacios-marinos-protegidos/red-areas-marin-as-protegidas-espana/bm_emprot_rampe_espacios.aspx</a>                                                                                                                                                                                                                                                                            |

| Latent variable       | Class<br>(Integrated<br>indices)                    | Manifest variable   | Type of<br>Model | Data source                                                                                                                                                                                                                                                                                                                                                                                                                                                                                                                                                                                                                                                                                                                                                                                                                                                                                                                       |
|-----------------------|-----------------------------------------------------|---------------------|------------------|-----------------------------------------------------------------------------------------------------------------------------------------------------------------------------------------------------------------------------------------------------------------------------------------------------------------------------------------------------------------------------------------------------------------------------------------------------------------------------------------------------------------------------------------------------------------------------------------------------------------------------------------------------------------------------------------------------------------------------------------------------------------------------------------------------------------------------------------------------------------------------------------------------------------------------------|
|                       |                                                     |                     |                  | <a href="http://protegidos/red-areas-marinas-protegidas-espana/bm_emprot_rampe_espacios.aspx">protegidos/red-areas-marinas-protegidas-espana/bm_emprot_rampe_espacios.aspx</a>                                                                                                                                                                                                                                                                                                                                                                                                                                                                                                                                                                                                                                                                                                                                                    |
| Conservation Policies | Total Number of Marine Protected areas and reserves | Paraje Natural (n°) | Formative        | <a href="http://www.reservasmarinas.net">http://www.reservasmarinas.net</a><br><a href="https://www.miteco.gob.es/es/costas/temas/proteccion-medio-marino/biodiversidad-marina/espacios-marinos-protegidos/red-areas-marinas-protegidas-espana/bm_emprot_rampe_espacios.aspx">https://www.miteco.gob.es/es/costas/temas/proteccion-medio-marino/biodiversidad-marina/espacios-marinos-protegidos/red-areas-marinas-protegidas-espana/bm_emprot_rampe_espacios.aspx</a><br><a href="http://www.juntadeandalucia.es/medioambiente/site/portalweb/menuitem.7e1cf46ddf59bb227a9ebe205510e1ca/?vgnextoid=2b22ad0b5688f410VgnVCM1000001325e50aRCRD&amp;vgnextchannel=d8d64e5bf01f4310VgnVCM1000001325e50aRCRD">http://www.juntadeandalucia.es/medioambiente/site/portalweb/menuitem.7e1cf46ddf59bb227a9ebe205510e1ca/?vgnextoid=2b22ad0b5688f410VgnVCM1000001325e50aRCRD&amp;vgnextchannel=d8d64e5bf01f4310VgnVCM1000001325e50aRCRD</a> |
| Conservation Policies | Total Number of Marine Protected areas and reserves | Parque Natural (n°) | Formative        | <a href="http://www.reservasmarinas.net">http://www.reservasmarinas.net</a><br><a href="https://www.miteco.gob.es/es/costas/temas/proteccion-medio-marino/biodiversidad-marina/espacios-marinos-protegidos/red-areas-marinas-protegidas-espana/bm_emprot_rampe_espacios.aspx">https://www.miteco.gob.es/es/costas/temas/proteccion-medio-marino/biodiversidad-marina/espacios-marinos-protegidos/red-areas-marinas-protegidas-espana/bm_emprot_rampe_espacios.aspx</a><br><a href="http://www.juntadeandalucia.es/medioambiente/site/portalweb/menuitem.7e1cf46ddf59bb227a9ebe205510e1ca/?vgnextoid=2b22ad0b5688f410VgnVCM1000001325e50aRCRD&amp;vgnextchannel=d8d64e5bf01f4310VgnVCM1000001325e50aRCRD">http://www.juntadeandalucia.es/medioambiente/site/portalweb/menuitem.7e1cf46ddf59bb227a9ebe205510e1ca/?vgnextoid=2b22ad0b5688f410VgnVCM1000001325e50aRCRD&amp;vgnextchannel=d8d64e5bf01f4310VgnVCM1000001325e50aRCRD</a> |

<sup>a</sup>Sites of Community Importance (SCI), <sup>b</sup>Special Protection Areas (SPA), <sup>c</sup>Special Areas of Conservation (SAC); \*Deleted indicator from the PSL-PM analyses because their low Communalities values

**Table S2.** Weights of the MVs of the outer model of the Gulf of Cádiz. The weights of the formative indicators are used to determine which MV contribute most effectively to its forming LV (marked in bold).

| Latent Variable     | Manifest variables                                      | Outer weights | Outer weights (Bootstrap) | S.E.  | Lower Confidence limit (95%) | Upper Confidence limit (95%) |
|---------------------|---------------------------------------------------------|---------------|---------------------------|-------|------------------------------|------------------------------|
| Management policies | European Management policies                            | 0.206         | 0.262                     | 0.150 | 0.065                        | 0.723                        |
|                     | National Management policies                            | 0.340         | 0.318                     | 0.228 | -0.058                       | 0.902                        |
|                     | Regional Management policies                            | <b>0.589</b>  | 0.534                     | 0.215 | -0.023                       | 0.835                        |
| Pressures           | Population (inhabitants/yr)                             | -0.192        | -0.249                    | 0.170 | -0.659                       | 0.164                        |
|                     | Overexploitation                                        | <b>0.973</b>  | 0.916                     | 0.141 | 0.553                        | 1.205                        |
|                     | Land use change                                         | 0.175         | 0.180                     | 0.112 | -0.102                       | 0.465                        |
| Biodiversity loss   | nº bony fish spp.                                       | 0.150         | 0.152                     | 0.076 | 0.008                        | 0.440                        |
|                     | nº cartilaginous fish spp.                              | <b>0.180</b>  | 0.177                     | 0.047 | 0.045                        | 0.266                        |
|                     | nº molluscs spp.                                        | -0.123        | -0.123                    | 0.029 | -0.179                       | -0.064                       |
|                     | nº crustacean spp.                                      | 0.042         | 0.035                     | 0.051 | -0.072                       | 0.153                        |
|                     | UICN (fisheries)                                        | 0.250         | 0.249                     | 0.006 | 0.238                        | 0.262                        |
|                     | IUCN (unexploited)                                      | 0.259         | 0.258                     | 0.009 | 0.241                        | 0.275                        |
|                     | IUCN (Global)                                           | 0.258         | 0.256                     | 0.005 | 0.248                        | 0.270                        |
| Cultural ES         | Artisanal fishery features                              | 1.000         | 0.992                     | 0.002 | 0.988                        | 0.995                        |
| Regulating ES       | PPR                                                     | 1.000         | 0.992                     | 0.002 | 0.988                        | 0.995                        |
| Provisioning ES     | Total fisheries' biomass for all groups (kg)            | 0.465         | 0.460                     | 0.016 | 0.417                        | 0.488                        |
|                     | Fishermen                                               | 0.611         | 0.608                     | 0.047 | 0.530                        | 0.736                        |
| Conservation Policy | Number of regulations for protected areas               | 0.008         | 0.005                     | 0.039 | -0.102                       | 0.075                        |
|                     | Total Number of Marine Protected areas and reserves     | <b>1.728</b>  | 1.764                     | 0.420 | 1.081                        | 2.867                        |
|                     | Changes in the Total Marine Protected Area Surface (ha) | -0.742        | -0.788                    | 0.429 | -1.921                       | -0.101                       |

**Table S3.** Weights of the MVs of the outer model of Alborán. The weights of the formative indicators are used to determine which MV contribute most effectively to its forming LV (marked in bold).

| Latent Variable       | Manifest variables                                                | Outer weights | Outer weights (Bootstrap) | S.E.  | Lower Confidence limit (95%) | Upper Confidence limit (95%) |
|-----------------------|-------------------------------------------------------------------|---------------|---------------------------|-------|------------------------------|------------------------------|
| Regulating ES         | ITM                                                               | 0.534         | 0.526                     | 0.021 | 0.485                        | 0.592                        |
|                       | PPR                                                               | 0.534         | 0.532                     | 0.025 | 0.483                        | 0.597                        |
| Cultural ES           | Artisanal fishery features                                        | 1.000         | 0.991                     | 0.002 | 0.986                        | 0.996                        |
| Provisioning ES       | Total fisheries' biomass for all groups (kg)                      | 0.484         | 0.480                     | 0.009 | 0.455                        | 0.493                        |
|                       | Evolution of the number of professional fishermen's organizations | 0.556         | 0.550                     | 0.016 | 0.526                        | 0.591                        |
| Biodiversity Loss     | n° bony fish spp.                                                 | <b>0.362</b>  | 0.355                     | 0.068 | 0.255                        | 0.513                        |
|                       | n° cartilaginous fish spp.                                        | -0.023        | -0.048                    | 0.070 | -0.222                       | 0.059                        |
|                       | n° molluscs spp.                                                  | -0.097        | -0.078                    | 0.027 | -0.131                       | -0.024                       |
|                       | n° crustacean spp.                                                | -0.025        | -0.020                    | 0.033 | -0.081                       | 0.051                        |
|                       | IUCN (fisheries)                                                  | 0.183         | 0.198                     | 0.022 | 0.170                        | 0.236                        |
|                       | IUCN (unexploited spp.)                                           | 0.212         | 0.203                     | 0.013 | 0.174                        | 0.223                        |
|                       | IUCN (Global)                                                     | 0.230         | 0.221                     | 0.011 | 0.202                        | 0.238                        |
|                       | IUCN (Mediterranean)                                              | 0.239         | 0.229                     | 0.013 | 0.207                        | 0.250                        |
| Conservation Policies | Number of regulations for protected areas                         | 0.059         | 0.071                     | 0.055 | -0.062                       | 0.167                        |
|                       | Total Number of Marine Protected areas and reserves               | <b>0.878</b>  | 0.891                     | 0.191 | 0.384                        | 1.195                        |
|                       | Changes in the Total Marine Protected Area Surface (ha)           | 0.106         | 0.081                     | 0.202 | -0.251                       | 0.617                        |
| Management Policies   | European Management Policies                                      | 0.078         | 0.133                     | 0.168 | -0.117                       | 0.590                        |
|                       | National Management policies                                      | 0.355         | 0.375                     | 0.204 | 0.051                        | 0.795                        |
|                       | Regional Management policies                                      | <b>0.636</b>  | 0.551                     | 0.199 | -0.032                       | 0.919                        |
| Pressures             | Population (inhabitants/yr)                                       | 0.348         | 0.295                     | 0.162 | -0.144                       | 0.569                        |
|                       | Overexploitation                                                  | <b>1.074</b>  | 1.027                     | 0.112 | 0.721                        | 1.202                        |
|                       | Land use change                                                   | -0.287        | -0.275                    | 0.081 | -0.441                       | -0.077                       |

**Table S4.** Cross-loading matrix of the outer model of Gulf of Cádiz. Loadings of a MV with the rest of LVs. The shared variance between LV and its MVs must be larger than the shared with other LV looking at the diagonal of the cross-loading matrix block by block.

| Cross loadings                                                          | Management policies | Pressures     | Biodiversity loss | Cultural ES  | Regulating ES | Provisioning ES | Conservation Policy |
|-------------------------------------------------------------------------|---------------------|---------------|-------------------|--------------|---------------|-----------------|---------------------|
| European Management policies                                            | <b>0.635</b>        | -0.538        | 0.543             | 0.021        | -0.344        | -0.516          | 0.529               |
| National Management policies                                            | <b>0.915</b>        | -0.775        | 0.746             | 0.145        | -0.352        | -0.682          | 0.743               |
| Regional Management policies                                            | <b>0.946</b>        | -0.802        | 0.743             | 0.195        | -0.339        | -0.688          | 0.736               |
| Population (inhabitants/yr)                                             | 0.756               | <b>-0.911</b> | 0.908             | -0.160       | -0.629        | -0.919          | 0.969               |
| Overexploitation                                                        | -0.840              | <b>0.997</b>  | -0.982            | 0.221        | 0.621         | 0.924           | -0.958              |
| Land use change                                                         | 0.663               | <b>-0.836</b> | 0.864             | -0.327       | -0.659        | -0.856          | 0.897               |
| n° bony fish spp.                                                       | 0.757               | -0.953        | <b>0.962</b>      | -0.265       | -0.640        | -0.931          | 0.951               |
| n° cartilaginous fish spp.                                              | 0.607               | -0.881        | <b>0.915</b>      | -0.373       | -0.692        | -0.904          | 0.905               |
| n° molluscs spp.                                                        | 0.560               | -0.681        | <b>0.642</b>      | -0.003       | -0.148        | -0.629          | 0.666               |
| n° crustacean spp.                                                      | 0.739               | -0.927        | <b>0.928</b>      | -0.278       | -0.616        | -0.871          | 0.888               |
| UICN (fisheries)                                                        | 0.891               | -0.975        | <b>0.963</b>      | -0.061       | -0.604        | -0.918          | 0.936               |
| IUCN (unexploited)                                                      | 0.656               | -0.874        | <b>0.919</b>      | -0.390       | -0.640        | -0.834          | 0.873               |
| IUCN Global)                                                            | 0.879               | -0.984        | <b>0.980</b>      | -0.110       | -0.624        | -0.928          | 0.950               |
| Artisanal fishery features                                              | 0.169               | 0.189         | -0.263            | <b>1.000</b> | 0.400         | 0.199           | -0.231              |
| PPR                                                                     | -0.390              | 0.610         | -0.706            | 0.400        | <b>1.000</b>  | 0.797           | -0.671              |
| Total fisheries' biomass for all groups (kg)                            | -0.481              | 0.697         | -0.746            | 0.218        | 0.867         | <b>0.906</b>    | -0.739              |
| Evolution of the number of professional fishermen's organizations *(-1) | -0.851              | <b>0.986</b>  | -0.980            | 0.159        | 0.644         | 0.947           | -0.976              |
| Number of regulations for protected areas                               | -0.064              | -0.114        | 0.180             | -0.350       | -0.221        | -0.209          | <b>0.186</b>        |
| Total Number of Marine Protected areas and reserves                     | 0.802               | -0.961        | 0.960             | -0.177       | -0.655        | -0.941          | <b>0.995</b>        |
| Changes in the Total Marine Protected Area Surface (ha)                 | 0.795               | -0.942        | 0.937             | -0.105       | -0.624        | -0.927          | <b>0.971</b>        |

**Table S5.** Cross-loading matrix of the outer model of Alborán. Loadings of a MV with the rest of LVs. The shared variance between LV and its MVs must be larger than the shared with other LV looking at the diagonal of the cross-loading matrix block by block.

| Cross loadings                                                             | Regulating<br>ES | Cultural<br>ES | Provisioning<br>ES | Biodiversity<br>Loss | Conservation<br>Policies | Management<br>Policies | Pressures     |
|----------------------------------------------------------------------------|------------------|----------------|--------------------|----------------------|--------------------------|------------------------|---------------|
| ITM                                                                        | <b>0.936</b>     | 0.615          | 0.804              | -0.809               | -0.757                   | -0.526                 | 0.716         |
| PPR                                                                        | <b>0.936</b>     | 0.685          | 0.923              | -0.808               | -0.813                   | -0.660                 | 0.788         |
| Artisanal fishery<br>features                                              | 0.694            | <b>1.000</b>   | 0.860              | -0.904               | -0.937                   | -0.909                 | 0.960         |
| Total fisheries' biomass<br>for all groups (kg)                            | 0.909            | 0.700          | <b>0.956</b>       | -0.838               | -0.834                   | -0.663                 | 0.801         |
| Evolution of the number<br>of professional<br>fishermen's<br>organizations | 0.867            | 0.938          | <b>0.966</b>       | -0.961               | -0.980                   | -0.881                 | 0.975         |
| n° bony fish spp.                                                          | -0.895           | -0.848         | -0.921             | <b>0.913</b>         | 0.935                    | 0.747                  | -0.876        |
| n° cartilaginous fish spp.                                                 | -0.856           | -0.760         | -0.859             | <b>0.847</b>         | 0.853                    | 0.650                  | -0.782        |
| n° molluscs spp.                                                           | -0.585           | -0.348         | -0.455             | <b>0.436</b>         | 0.468                    | 0.212                  | -0.337        |
| n° crustacean spp.                                                         | -0.830           | -0.762         | -0.845             | <b>0.803</b>         | 0.854                    | 0.660                  | -0.786        |
| IUCN (fisheries)                                                           | -0.524           | -0.713         | -0.628             | <b>0.785</b>         | 0.716                    | 0.649                  | -0.728        |
| IUCN (unexploited spp.)                                                    | -0.826           | -0.644         | -0.831             | <b>0.866</b>         | 0.779                    | 0.590                  | -0.764        |
| IUCN (Global)                                                              | -0.812           | -0.768         | -0.862             | <b>0.956</b>         | 0.864                    | 0.702                  | -0.859        |
| IUCN (Mediterranean)                                                       | -0.748           | -0.935         | -0.847             | 0.856                | <b>0.907</b>             | 0.813                  | -0.896        |
| Number of regulations<br>for protected areas                               | -0.205           | -0.299         | -0.314             | 0.319                | <b>0.331</b>             | 0.330                  | -0.325        |
| Total Number of Marine<br>Protected areas and<br>reserves                  | -0.844           | -0.935         | -0.946             | 0.962                | <b>0.998</b>             | 0.864                  | -0.963        |
| Changes in the Total<br>Marine Protected Area<br>Surface (ha)              | -0.797           | -0.927         | -0.933             | 0.946                | <b>0.981</b>             | 0.892                  | -0.971        |
| European Management<br>Policies                                            | -0.462           | -0.568         | -0.546             | 0.503                | 0.624                    | <b>0.655</b>           | -0.606        |
| National Management<br>policies                                            | -0.586           | -0.843         | -0.739             | 0.765                | 0.815                    | <b>0.924</b>           | -0.855        |
| Regional Management<br>policies                                            | -0.612           | -0.890         | -0.796             | 0.798                | 0.842                    | <b>0.977</b>           | -0.904        |
| Population<br>(inhabitants/yr)                                             | -0.885           | -0.886         | -0.948             | 0.920                | 0.958                    | 0.774                  | <b>-0.901</b> |
| Overexploitation                                                           | 0.798            | 0.975          | 0.918              | -0.948               | -0.971                   | -0.920                 | <b>0.994</b>  |
| Land use change                                                            | -0.886           | -0.772         | -0.951             | 0.892                | 0.899                    | 0.720                  | <b>-0.858</b> |



**Table S6.** Summary of the Marine Protected Areas (MPAs) of the marine areas of the Gulf of Cádiz.

| Marine Protected Area                        | Figure                                            | Year of creation | Governance          | Level of protection | Marine area   |
|----------------------------------------------|---------------------------------------------------|------------------|---------------------|---------------------|---------------|
| Doñana                                       | SCI <sup>a</sup>                                  | 1987             | Spanish government  | RN2000-EU           | Gulf of Cádiz |
| Doñana                                       | RAMSAR                                            | 1982             | Spanish government  | International       | Gulf of Cádiz |
| Doñana                                       | Biosphere Reserve                                 | 1980             | Spanish government  | International       | Gulf of Cádiz |
| Doñana                                       | SPA <sup>b</sup>                                  | 1987             | Spanish government  | RN2000-EU           | Gulf of Cádiz |
| Marismas de Isla Cristina                    | Paraje Natural                                    | 1989             | Regional government | Andalucía           | Gulf of Cádiz |
| Marismas de Isla Cristina                    | SCI <sup>a</sup>                                  | 2006             | Spanish government  | RN2000-EU           | Gulf of Cádiz |
| Marismas de Isla Cristina                    | SPA <sup>b</sup>                                  | 2002             | Spanish government  | RN2000-EU           | Gulf of Cádiz |
| Fondos Marinos Río Palmones                  | SCI <sup>a</sup>                                  | 2006             | Spanish government  | RN2000-EU           | Gulf of Cádiz |
| Fondos Marinos Río Palmones                  | Paraje Natural                                    | 1989             | Regional government | Andalucía           | Gulf of Cádiz |
| Fondos Marinos Río Palmones                  | SAC <sup>c</sup>                                  | 2002             | Spanish government  | RN2000-EU           | Gulf of Cádiz |
| Fondos Marinos Río Palmones                  | SPA <sup>b</sup>                                  | 2013             | Spanish government  | RN2000-EU           | Gulf of Cádiz |
| Fondos Marinos Bahía de Cádiz                | SCI <sup>a</sup>                                  | 2006             | Spanish government  | RN2000-EU           | Gulf of Cádiz |
| Fondos Marinos Bahía de Cádiz                | SAC <sup>c</sup>                                  | 2012             | Spanish government  | RN2000-EU           | Gulf of Cádiz |
| Bahía de Cádiz                               | Parque Natural                                    | 1989             | Regional government | Andalucía           | Gulf of Cádiz |
| Frente litoral Estrecho                      | SCI <sup>a</sup>                                  | 1989             | Spanish government  | RN2000-EU           | Gulf of Cádiz |
| Frente litoral Estrecho                      | SPA <sup>b</sup>                                  | 2003             | Spanish government  | RN2000-EU           | Gulf of Cádiz |
| Estrecho                                     | Biosphere Reserve                                 | 2006             | Spanish government  | International       | Gulf of Cádiz |
| Estrecho                                     | Parque Natural                                    | 2003             | Regional government | Andalucía           | Gulf of Cádiz |
| Estrecho                                     | SAC <sup>c</sup>                                  | 2012             | Spanish government  | RN2000-EU           | Gulf of Cádiz |
| La Breña y Marismas de Barbate               | SCI <sup>a</sup>                                  | 1997             | Spanish government  | RN2000-EU           | Gulf of Cádiz |
| La Breña y Marismas de Barbate               | Parque Natural                                    | 1989             | Regional government | Andalucía           | Gulf of Cádiz |
| La Breña y Marismas de Barbate               | SAC <sup>c</sup>                                  | 2012             | Spanish government  | RN2000-EU           | Gulf of Cádiz |
| La Breña y Marismas de Barbate               | SPA <sup>b</sup>                                  | 2002             | Spanish government  | RN2000-EU           | Gulf of Cádiz |
| Punta Trafalgar                              | SCI <sup>a</sup>                                  | 1999             | Spanish government  | RN2000-EU           | Gulf of Cádiz |
| Reserva de Pesca Desembocadura Guadalquivir  | Marine reserve for fishing                        | 2004             | Regional government | Andalucía           | Gulf of Cádiz |
| Reserva Intercontinental Andalucía-Marruecos | Intercontinental Marine Reserve Andalucía-Marocco | 2006             | Spanish government  | International       | Gulf of Cádiz |

<sup>a</sup>Sites of Community Importance (SCI), <sup>b</sup>Special Protection Areas (SPA), <sup>c</sup>Special Areas of Conservation (SAC)

**Table S7.** Summary of the Marine Protected Areas (MPAs) of the marine areas of the Alborán Sea.

| Marine Protected Area                      | Figure             | Year of creation | Governance          | Level of protection | Marine area |
|--------------------------------------------|--------------------|------------------|---------------------|---------------------|-------------|
| Acantilados Maro-Cerro Gordo               | Paraje Natural     | 1989             | Regional government | Andalucía           | Alborán sea |
| Acantilados Maro-Cerro Gordo               | SAC <sup>c</sup>   | 2014             | Spanish government  | RN2000-EU           | Alborán sea |
| Acantilados Maro-Cerro Gordo               | SCI <sup>a</sup>   | 2006             | Spanish government  | RN2000-EU           | Alborán sea |
| Acantilados Maro-Cerro Gordo               | SPA <sup>b</sup>   | 2010             | Spanish government  | RN2000-EU           | Alborán sea |
| Acantilados Maro-Cerro Gordo               | ZEPIM <sup>d</sup> | 2003             | Spanish government  | RN2000-EU           | Alborán sea |
| Bahía de Almería                           | SPA <sup>b</sup>   | 2014             | Spanish government  | RN2000-EU           | Alborán sea |
| Cabo de Gata-Níjar                         | Biosphere Reserve  | 1997             | Spanish government  | International       | Alborán sea |
| Cabo de Gata-Níjar                         | Marine Reserve     | 1995             | Spanish government  | National            | Alborán sea |
| Cabo de Gata-Níjar                         | Parque Natural     | 1988             | Regional government | Andalucía           | Alborán sea |
| Cabo de Gata-Níjar                         | SAC <sup>c</sup>   | 2012             | Spanish government  | RN2000-EU           | Alborán sea |
| Cabo de Gata-Níjar                         | SCI <sup>a</sup>   | 2006             | Spanish government  | RN2000-EU           | Alborán sea |
| Cabo de Gata-Níjar                         | SPA <sup>b</sup>   | 1989             | Spanish government  | RN2000-EU           | Alborán sea |
| Cabo de Gata-Níjar                         | ZEPIM <sup>d</sup> | 2001             | Spanish government  | International       | Alborán sea |
| El Saladillo-Punta de Baños                | SCI <sup>a</sup>   | 2012             | Spanish government  | International       | Alborán sea |
| Espacio Marino de Alborán                  | SCI <sup>a</sup>   | 2014             | Spanish government  | International       | Alborán sea |
| Estrecho Oriental                          | SCI <sup>a</sup>   | 2009             | Spanish government  | International       | Alborán sea |
| Estrecho Oriental                          | SAC <sup>c</sup>   | 2012             | Spanish government  | International       | Alborán sea |
| Fondos Marinos Calahonda-Castells de Ferro | SCI <sup>a</sup>   | 2006             | Spanish government  | International       | Alborán sea |
| Fondos Marinos Guadiaro                    | SCI <sup>a</sup>   | 2006             | Spanish government  | International       | Alborán sea |
| Fondos Marinos Levante almeriense          | SCI <sup>a</sup>   | 2006             | Spanish government  | International       | Alborán sea |
| Fondos Marinos Punta de la Mona            | SAC <sup>c</sup>   | 2014             | Spanish government  | International       | Alborán sea |
| Fondos Marinos Punta de la Mona            | SCI <sup>a</sup>   | 2006             | Spanish government  | International       | Alborán sea |
| Fondos Marinos Punta Entinas-Sabinar       | SCI <sup>a</sup>   | 2006             | Spanish government  | International       | Alborán sea |
| Fondos Marinos Punta Entinas-Sabinar       | SPA <sup>b</sup>   | 2003             | Spanish government  | International       | Alborán sea |
| Fondos Marinos Tesorillo-Salobreña         | SAC <sup>c</sup>   | 2014             | Spanish government  | International       | Alborán sea |
| Fondos Marinos Tesorillo-Salobreña         | SCI <sup>a</sup>   | 2006             | Spanish government  | International       | Alborán sea |

|                               |                            |      |                     |           |             |
|-------------------------------|----------------------------|------|---------------------|-----------|-------------|
| Isla Alborán                  | Marine Reserve             | 1997 | Spanish government  | National  | Alborán sea |
| Isla Alborán                  | Marine Reserve for fishing | 1997 | Spanish government  | National  | Alborán sea |
| Isla Alborán                  | Paraje Natural             | 2003 | Regional government | Andalucía | Alborán sea |
| Isla Alborán                  | SAC <sup>c</sup>           | 2015 | Spanish government  | RN2000-EU | Alborán sea |
| Isla Alborán                  | SCI <sup>a</sup>           | 2006 | Spanish government  | RN2000-EU | Alborán sea |
| Isla Alborán                  | SPA <sup>b</sup>           | 2001 | Spanish government  | RN2000-EU | Alborán sea |
| Isla Alborán y Fondos Marinos | ZEPIM <sup>d</sup>         | 2001 | Spanish government  | RN2000-EU | Alborán sea |
| Salinas Cabo de Gata          | RAMSAR                     | 2006 | Spanish government  | RN2000-EU | Alborán sea |

---

<sup>a</sup>Sites of Community Importance (SCI), <sup>b</sup>Special Protection Areas (SPA), <sup>c</sup>Special Areas of Conservation (SAC); <sup>d</sup>Zona especialmente protegida de importancia para el Mediterráneo (ZPIM)

**Figure S1.** Time series of the indicator set used for the Gulf of Cádiz area.

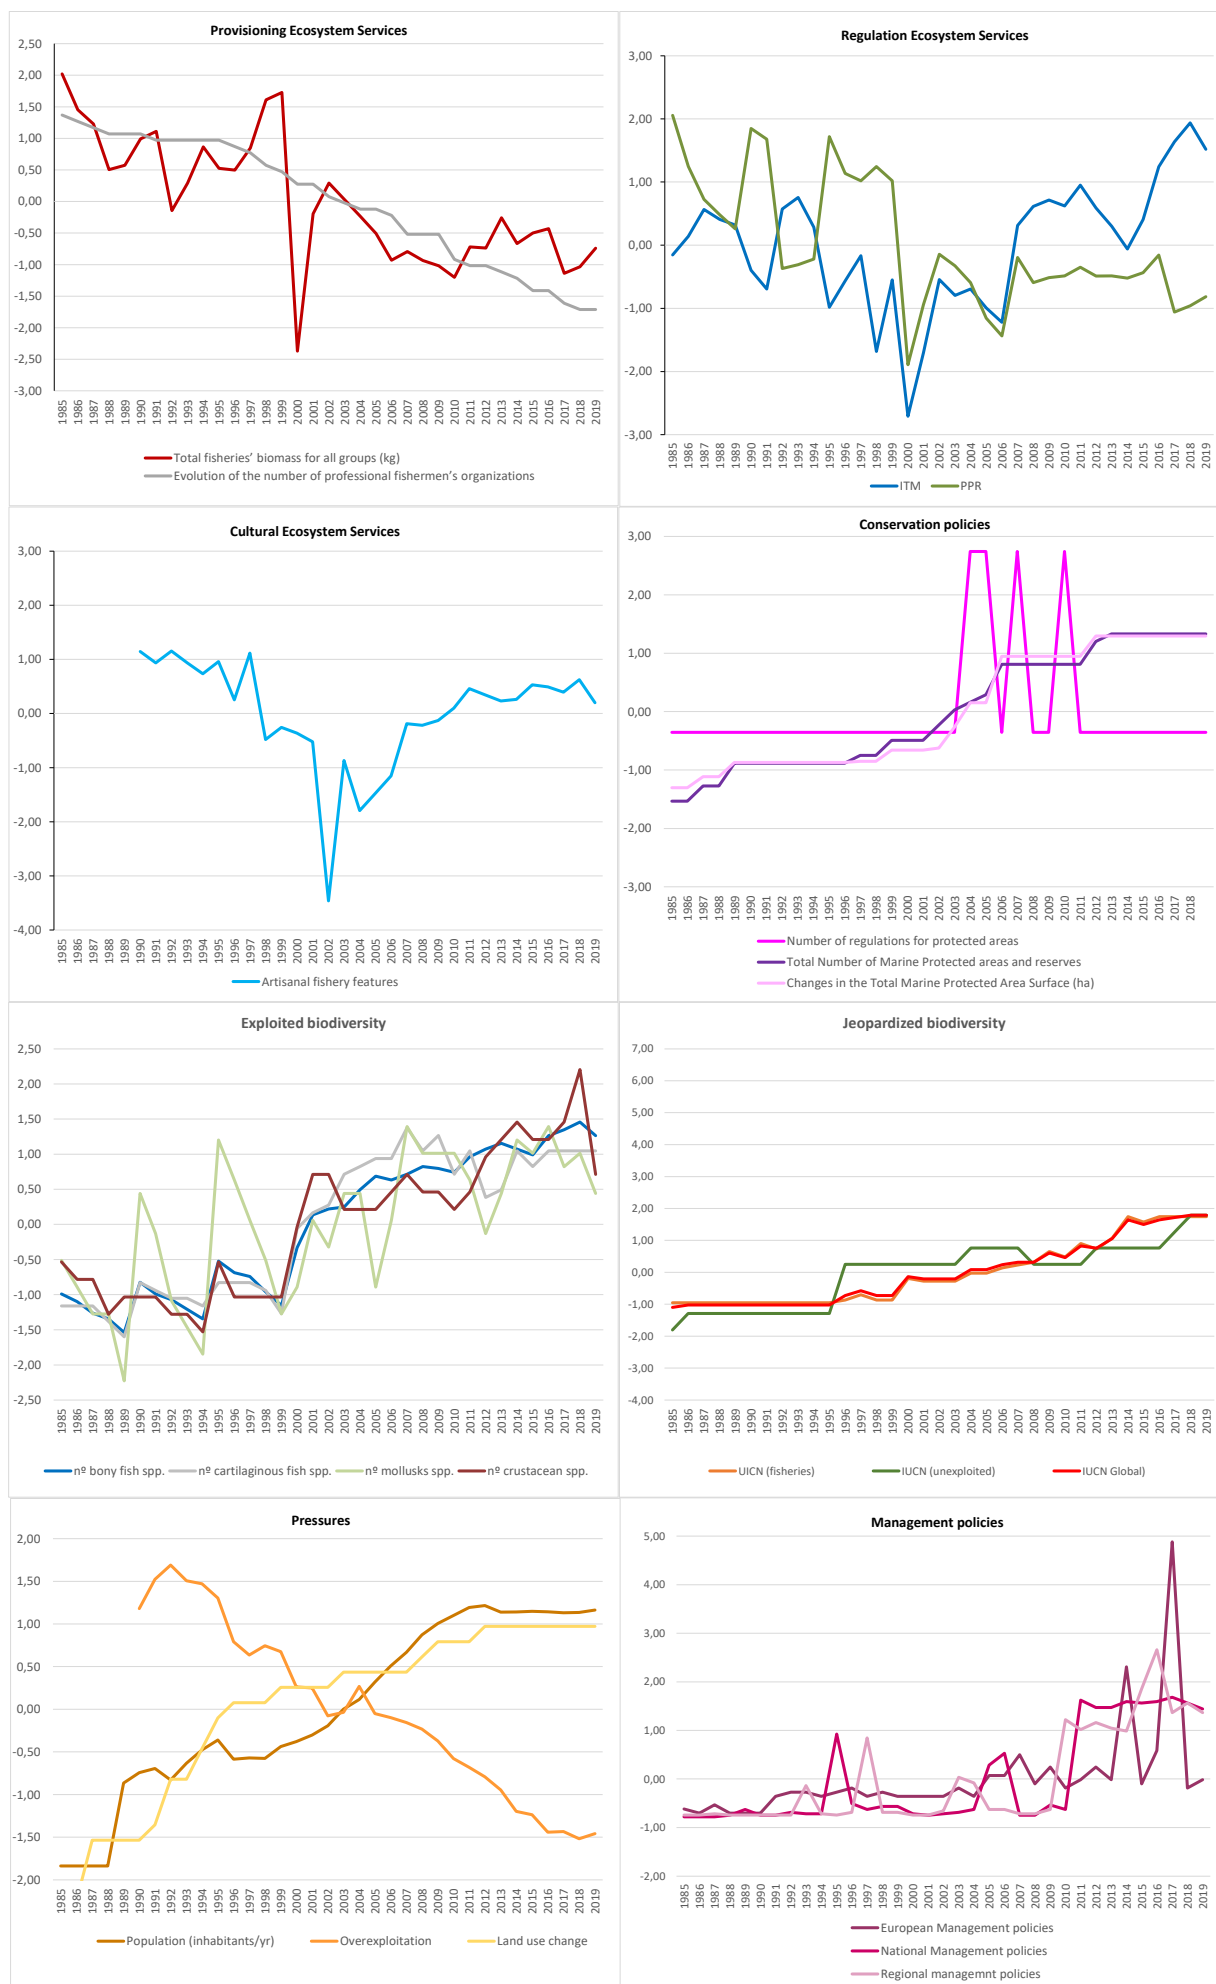

**Figure S2.** Time series of the indicator set used for the Alborán area.

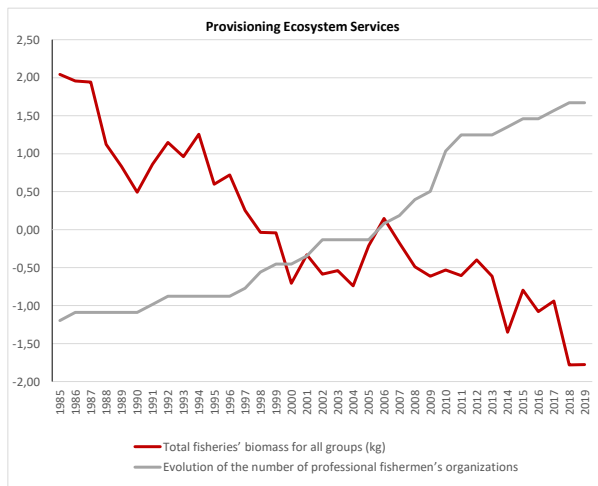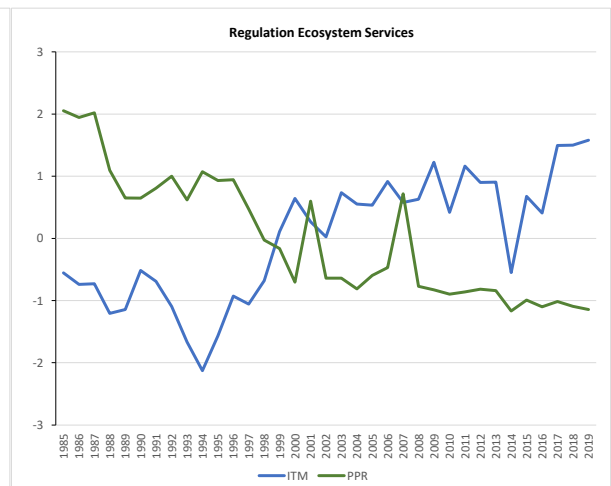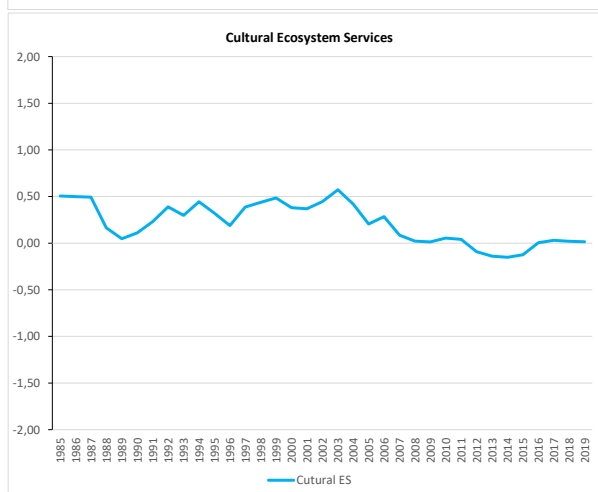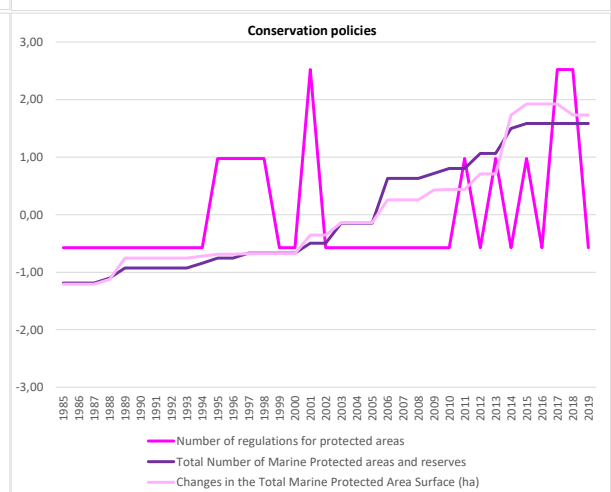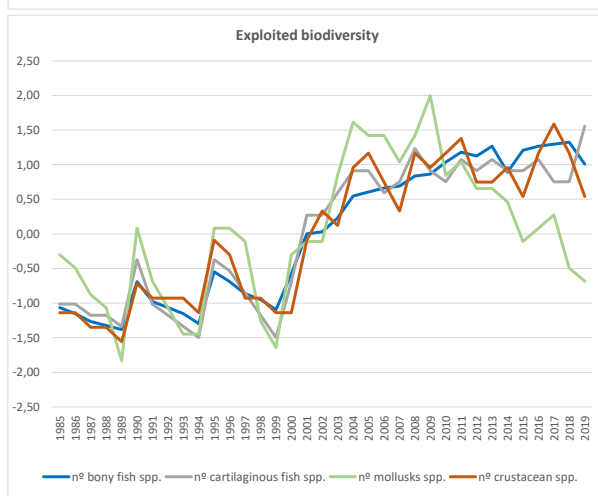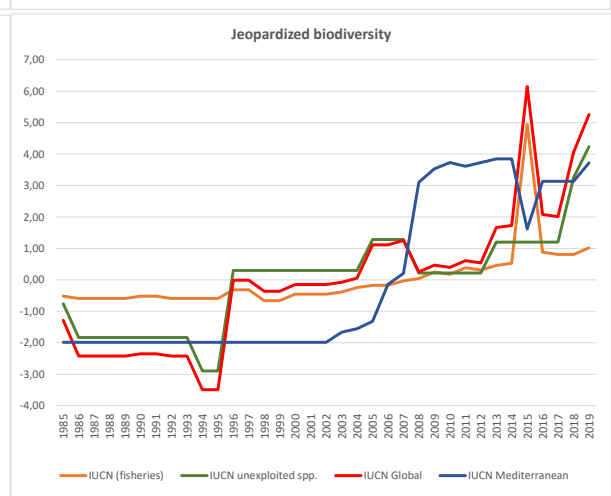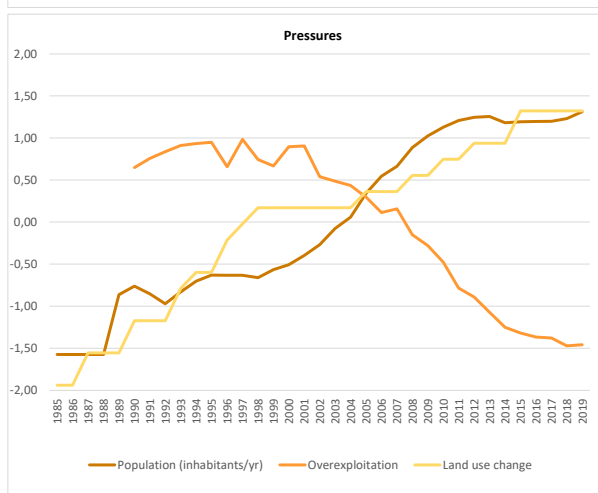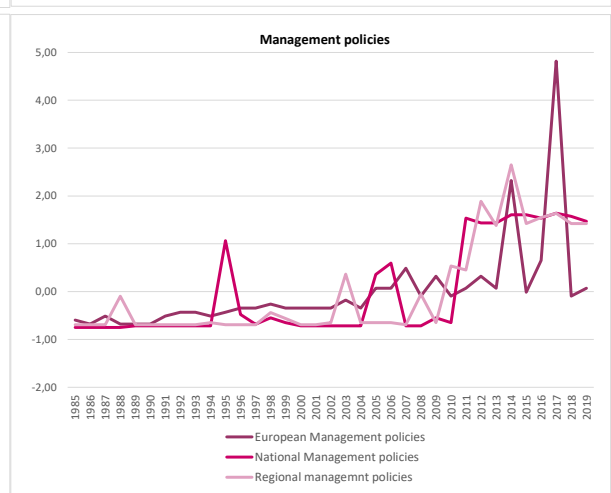

Supplement: s1 [file s1]
